# Supplementary material for: Tunable Cu–M bimetal catalysts enable syngas electrosynthesis from carbon dioxide
Source: Royal Society of Chemistry journal article supplement (doi:10.1039/d1nj04689f), 2021-12-21
Supplement: d1nj04689f1.pdf [file d1nj04689f1.pdf]

Electronic Supplementary Material for:

## **Tunable Cu-M bimetal catalysts enable syngas electrosynthesis from carbon dioxide**

Bo Xiong, Jing Liu\*, Yingju Yang\*, Junyan Ding, Zhixuan Hua

State Key Laboratory of Coal Combustion, School of Energy and Power Engineering, Huazhong University of Science and Technology, Wuhan 430074, China

### **Corresponding Author:**

\* Tel: +86 27 87545526; fax: +86 27 87545526;

E-mail address: [liujing27@mail.hust.edu.cn](mailto:liujing27@mail.hust.edu.cn);

[yangyingju@hust.edu.cn](mailto:yangyingju@hust.edu.cn).

**Content includes:** one.

**Fig. S1** The dissolution potential of Cu-M catalysts at 0 V.

**Fig. S2** (a) Schematic illustration of the structural model. a denotes Cu sites. b denotes M (M = Fe, Ru, Os, Rh, Ir, Ni, Pd, Pt, Cr, Mn, Mo, and W) sites. (b) The atomic structure of Cu-M catalysts.

**Fig. S3** Optimized structures of CO\* over the Cu-M catalysts.

**Fig. S4** Optimized structures of H\* over the Cu-M catalysts.

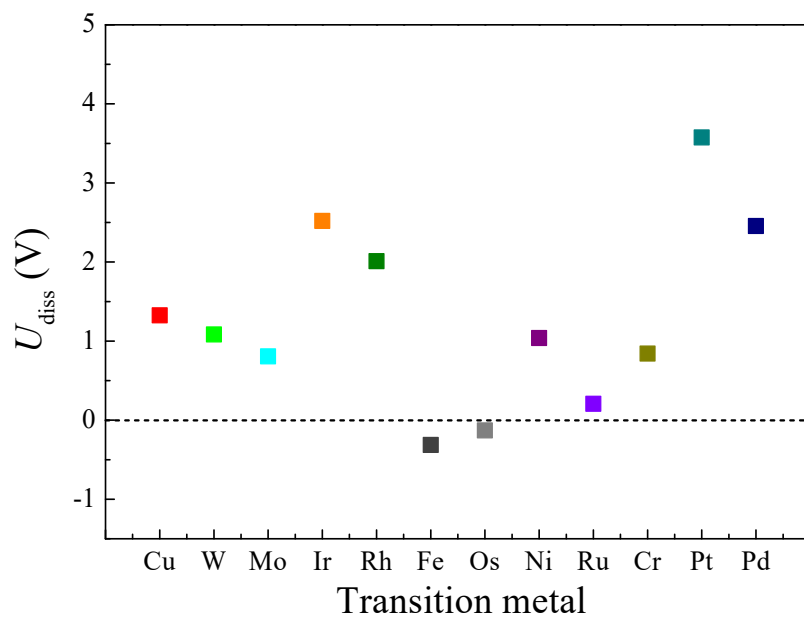

**Fig. S1** The dissolution potential of Cu-M catalysts at 0 V.

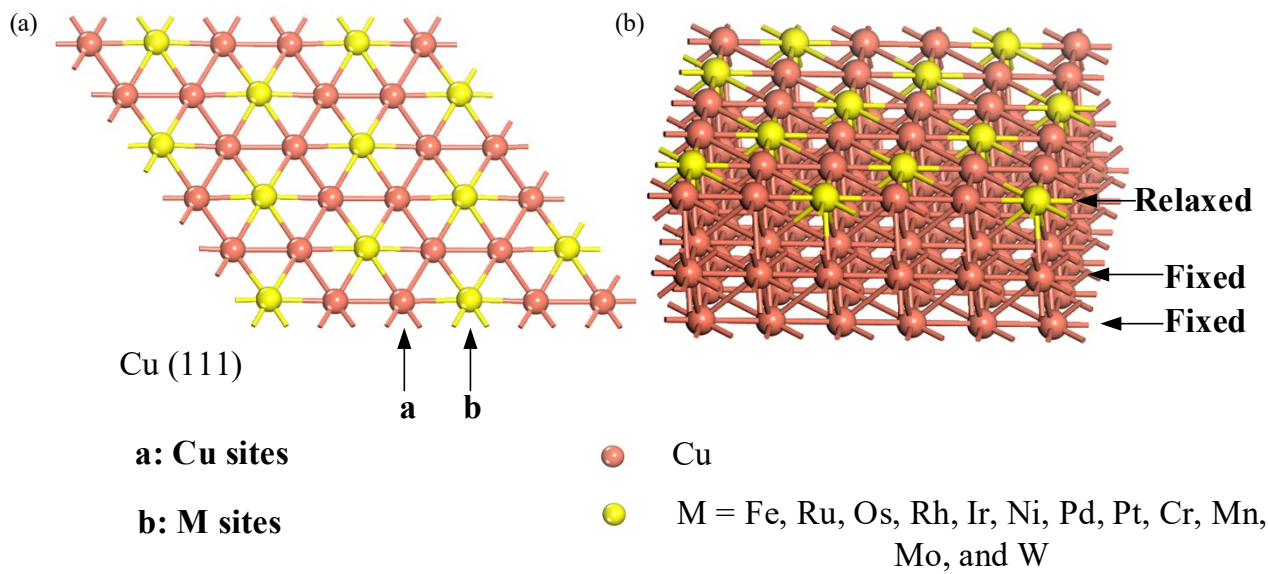

**Fig. S2** (a) Schematic illustration of the structural model. a denote Cu sites. b denote M (M = Fe, Ru, Os, Rh, Ir, Ni, Pd, Pt, Cr, Mn, Mo, and W) sites. (b) The atomic structure of Cu-M catalysts.

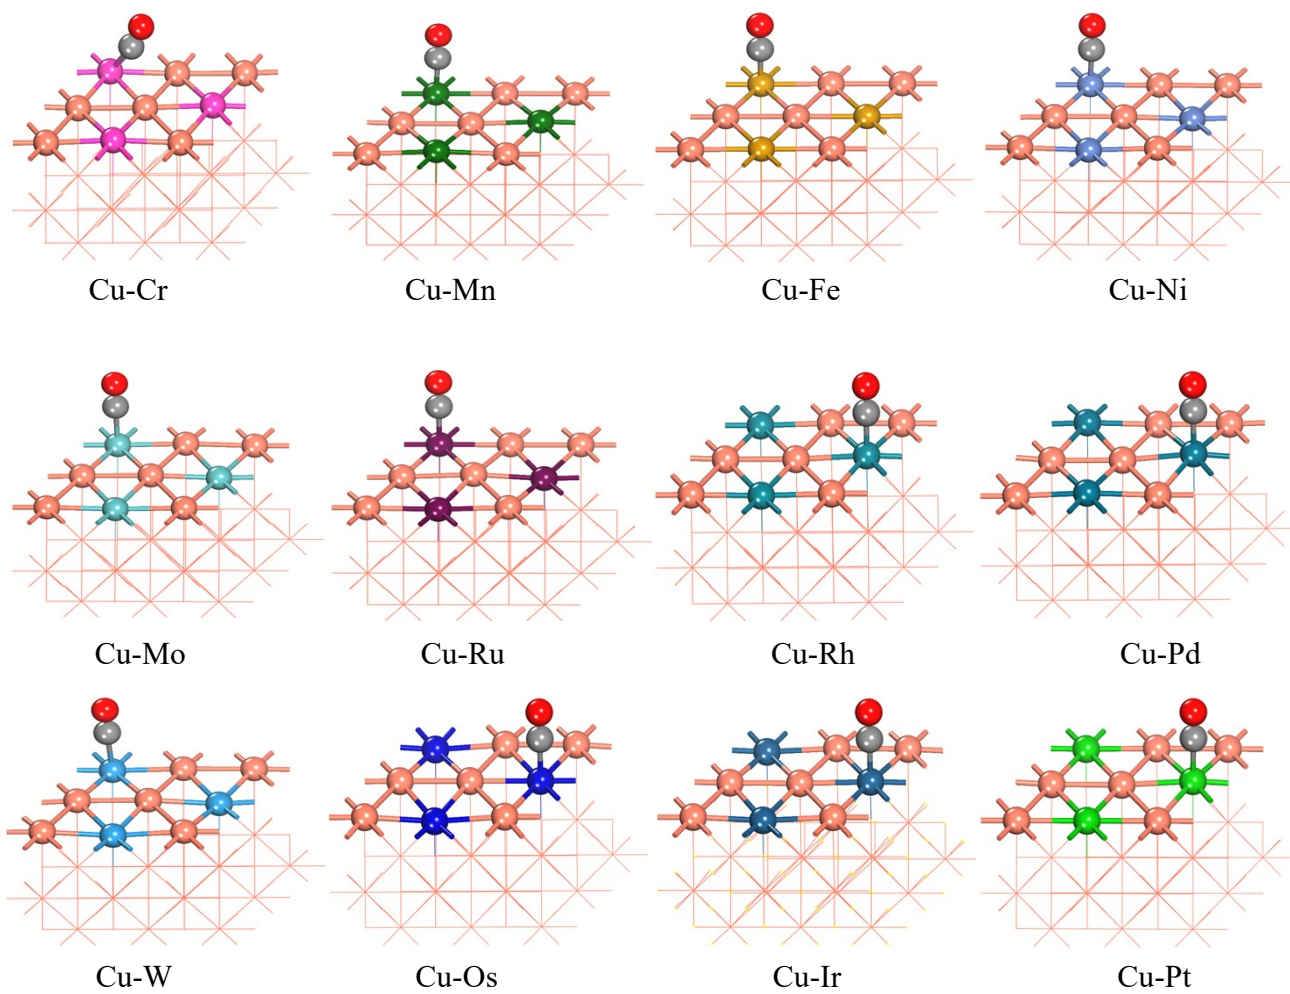

**Fig. S3** Optimized structures of CO\* over the Cu-M catalysts.

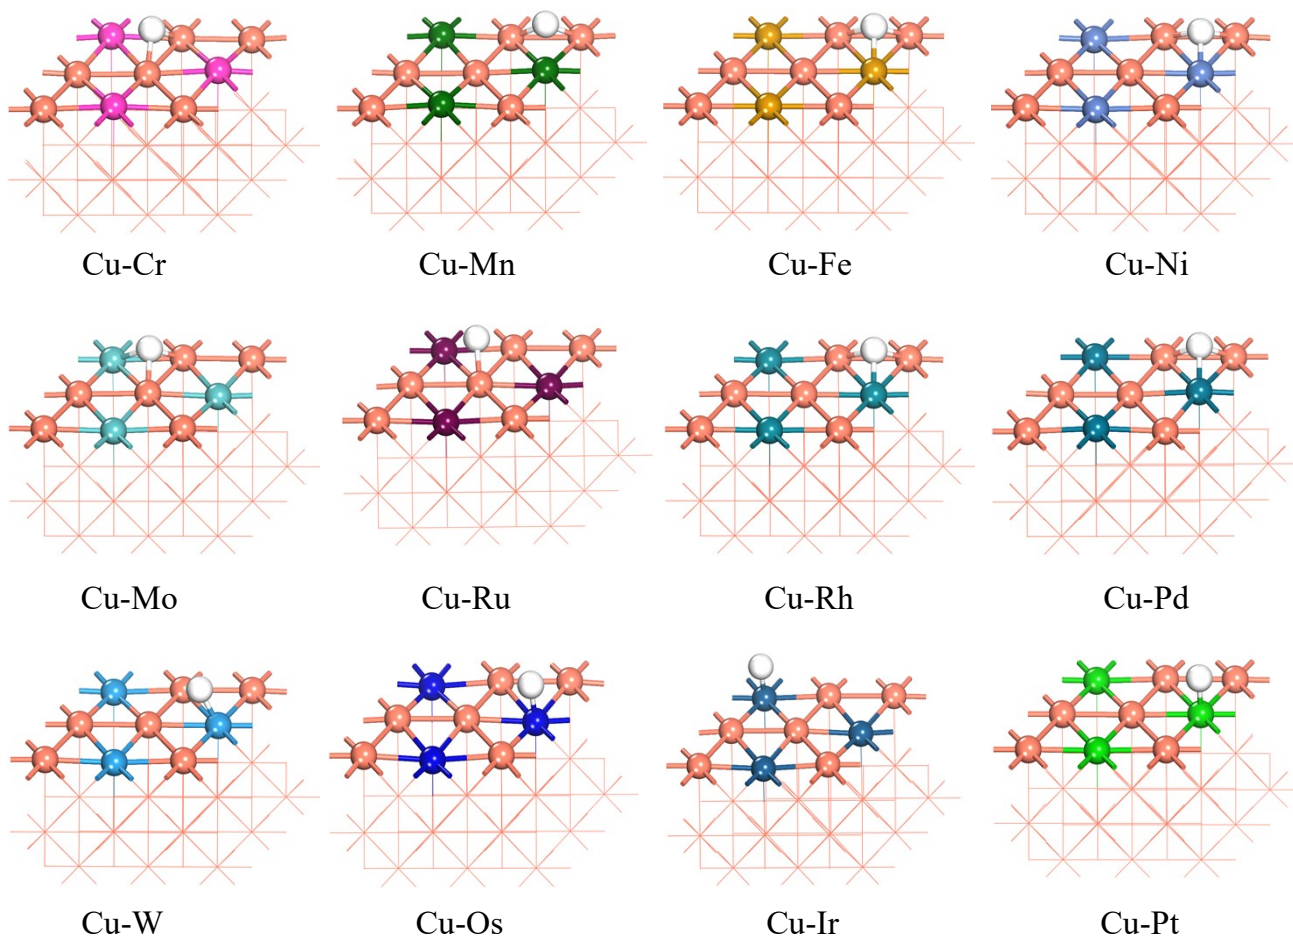

**Fig. S4** Optimized structures of H\* over the Cu-M catalysts.
